# Supplementary material
Source: MDPI journal article supplement (https://www.mdpi.com/1999-4907/13/2/341)
Supplement: s1 [file s1]

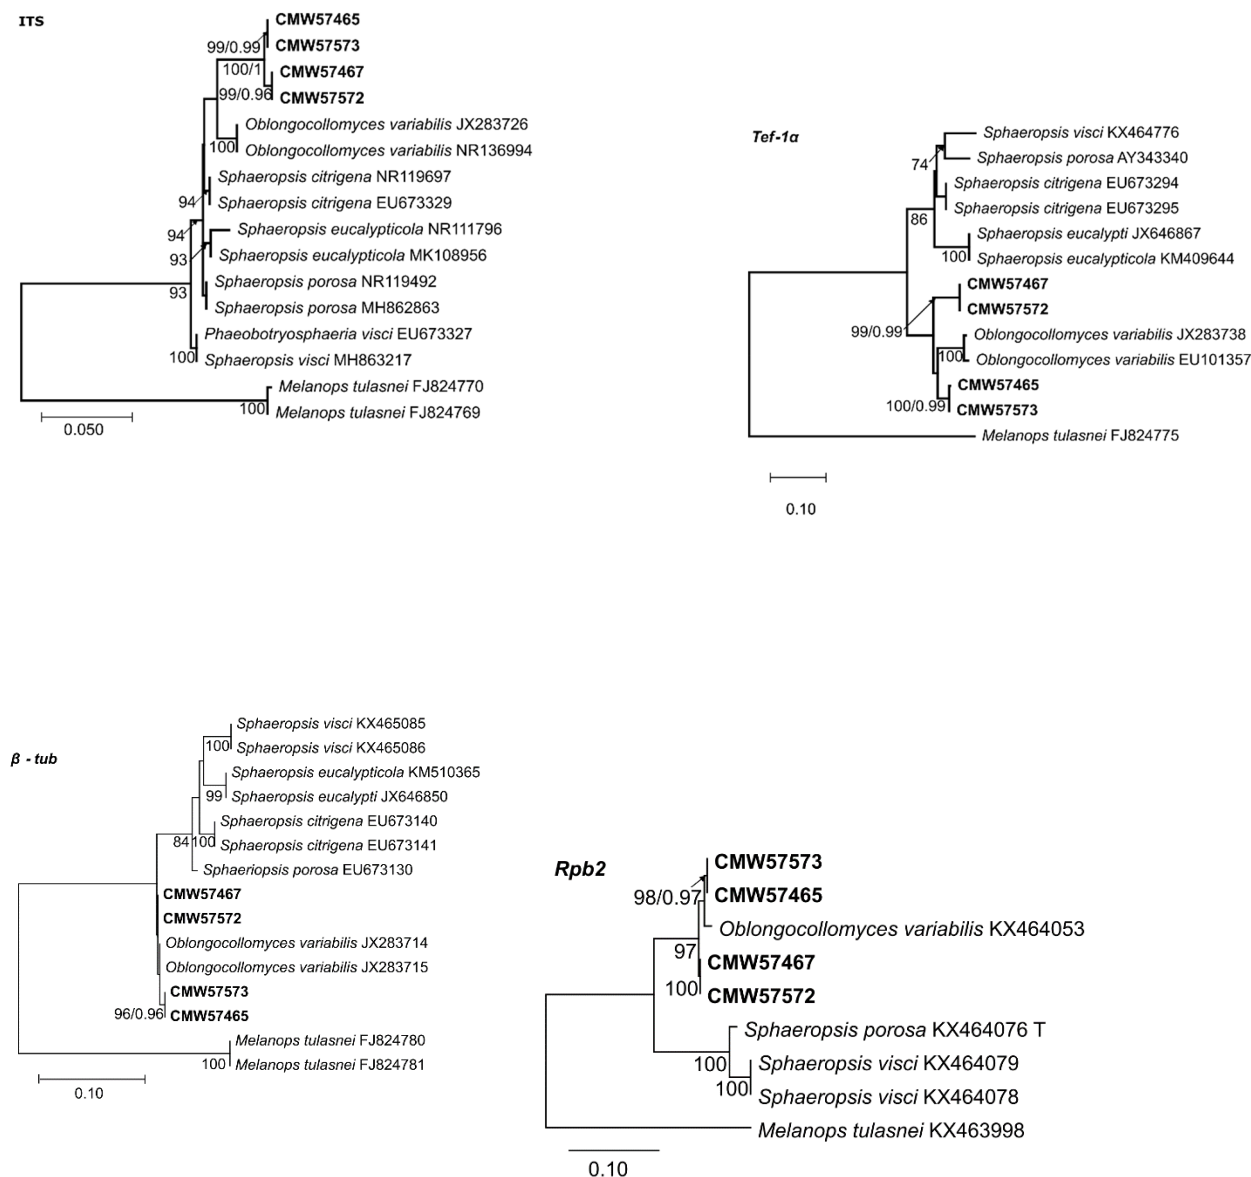

**Figure S1:** Genealogical concordance phylogenetic species recognition (GCPSR) based on analyses of the ITS, *tef-1α*, *β-tub* and *rpb2* sequence data. Bootstrap values above 70% and PP values above 0.95 are shown at the nodes. Isolates in **bold** were obtained in this study. The trees are rooted to isolates of *Melanops tulasnei* (CBS116805, CBS116806)
